# Supplementary material
Source: PubMed Central journal article supplement (PMC2828760)

Table S1: External and internal primers for mouse P2X2, P2X3, P2Y2, P2Y4 and GAPDH cDNA.

|                   |                  |                        |
|-------------------|------------------|------------------------|
| P2X2 (NM_153400)  | External Forward | CTCTTCAGTAACCATGTCCACG |
|                   | External Reverse | CCGGAAGACAGCTCTAATTTGG |
|                   | Internal Forward | GAAGATAGGCATCTTGCTCTGG |
|                   | Internal Reverse | GGGATCCTATGAGGAGTTCTGT |
| P2X3 (NM_145526)  | External Forward | GCTCCCTAGAAGAAGATGGAGA |
|                   | External Reverse | CTGTGTGACCATGTTAGGGATG |
|                   | Internal Forward | TGTCCTAAGAGGATCCTGTACC |
|                   | Internal Reverse | GGCATCTAGCACATAGAAGTGG |
| P2Y2 (NM_008773)  | External Forward | GGGAGAGTAGTGTAGCTGATGA |
|                   | External Reverse | GTCCTTGAGATCATGAGGCTTG |
|                   | Internal Forward | GTAGATGCCACACCTATCCAAC |
|                   | Internal Reverse | CCTTGAGATCATGAGGCTTGTC |
| P2Y4 (NM_020621)  | External Forward | CCCAAGAGTTGGTAGTAGACAC |
|                   | External Reverse | CGTGCTCTTTGGTCTGGTAATC |
|                   | Internal Forward | GTTGGTAGTAGACACAAGAGGG |
|                   | Internal Reverse | CAGCCTGGTCTATAGAGTGAGT |
| GAPDH (NM_008084) | External Forward | GCTGAGTATGTCGTGGAGTCTA |
|                   | External Reverse | CATACTTGGCAGGTTTCTCCAG |

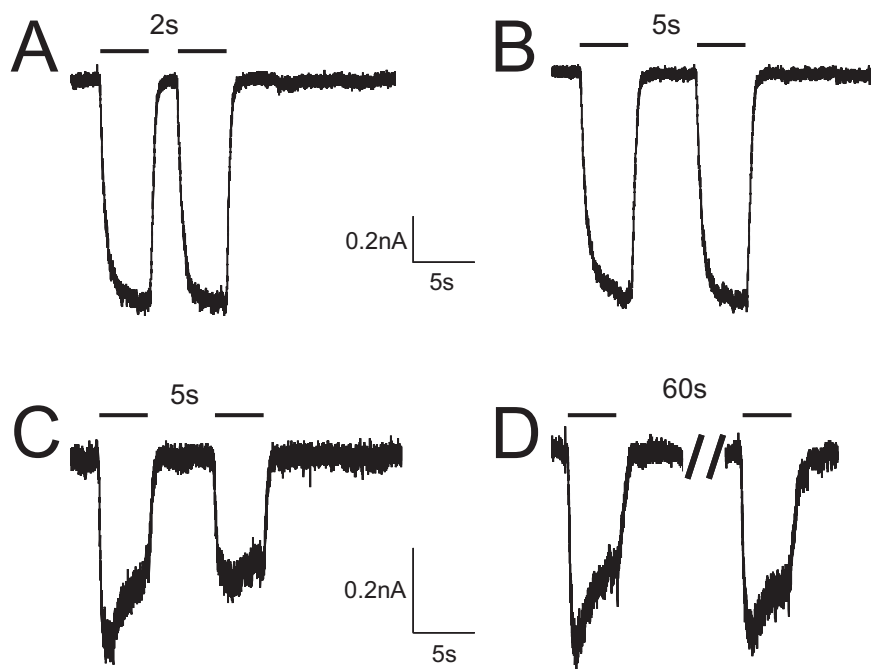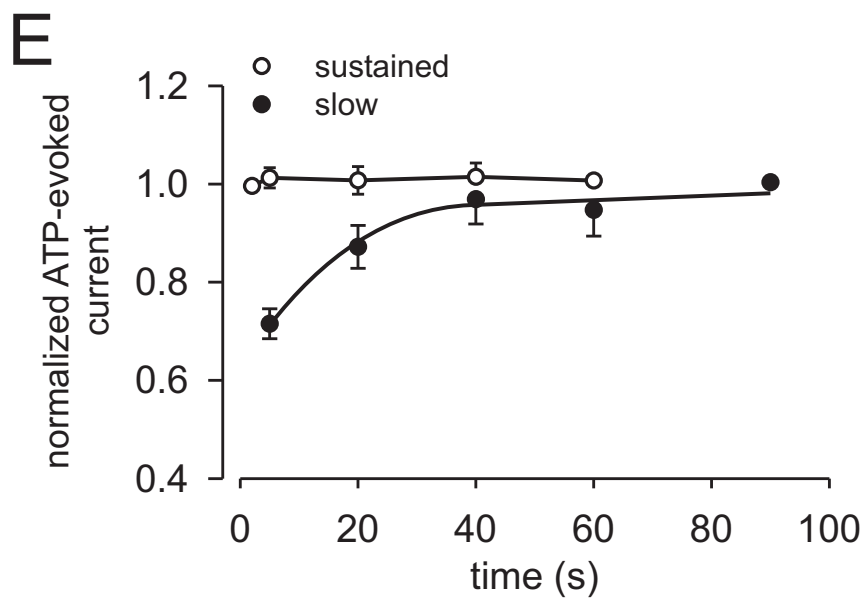

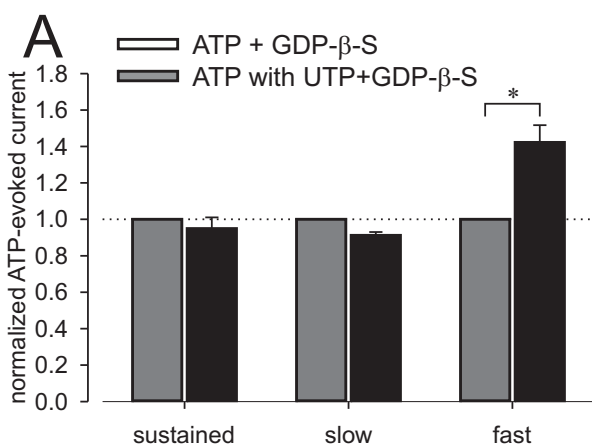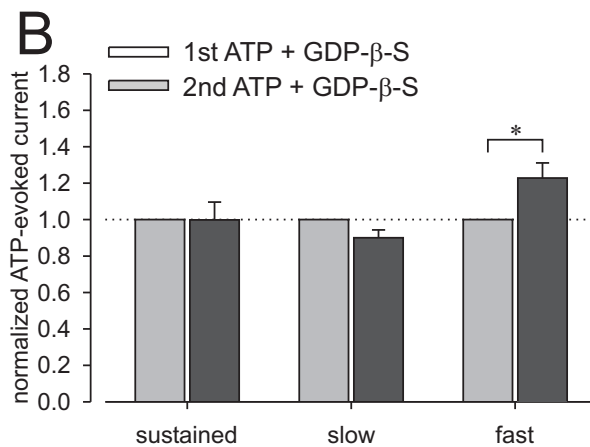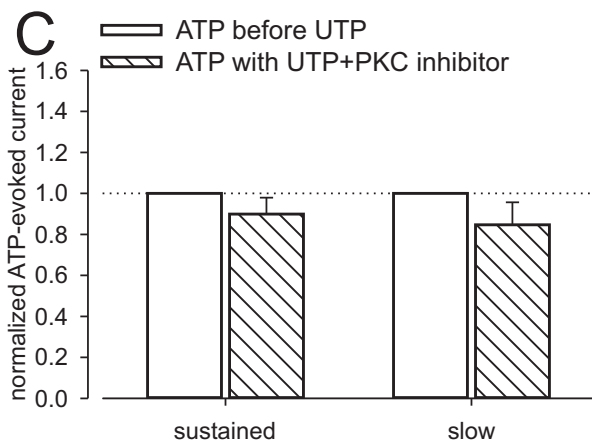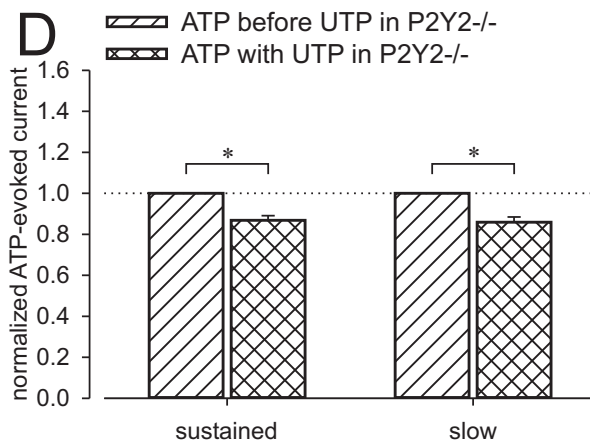

Supplement: NIHMS177003-supplement-Supp1.pdf [file NIHMS177003-supplement-Supp1.pdf]
